# Supplementary material for: Altered caudate connectivity is associated with executive dysfunction after traumatic brain injury
Source: PubMed Central journal article supplement (PMC5837394; doi:10.1093/brain/awx309), 2017-11-23
Supplement: brain-2017-00481-file012_awx309.pdf [file brain-2017-00481-file012_awx309.pdf]

| Study ID | Age | Gender | Time since Injury (months) | Length of PTA (Days) | Cause of Injury | Lowest GCS | Length of LOC | Initial CT findings                                                               | Initial MRI Findings                                                                                                                                                              | GOSE | Past Medical History | Medications at Visit              |
|----------|-----|--------|----------------------------|----------------------|-----------------|------------|---------------|-----------------------------------------------------------------------------------|-----------------------------------------------------------------------------------------------------------------------------------------------------------------------------------|------|----------------------|-----------------------------------|
| 002      | 65  | M      | 141                        | 60                   | RTA             | Unknown    | Unknown       | SDH: Right; Contusion: Right Temporal Lobe, Right Frontal Lobe, Left Frontal Lobe | Atrophy: Right Temporal Lobe; Contusion: Right Temporal Lobe, Left Inferior Frontal Lobe, Left Temporal Pole, Right Occipital Lobe; Microhaemorrhage: Left Superior Frontal Gyrus | 6    | None                 | None                              |
| 005      | 38  | M      | 49                         | 3                    | Violence        | Unknown    | 1-29 minutes  | Fracture: Right parietal; Contusion: Right temporal; SAH                          | Superficial Siderosis: Right Frontal, Right Temporal; Microbleed: Right Frontal                                                                                                   | 8    | None                 | None                              |
| 006      | 51  | F      | 37                         | 2                    | Incident/Fall   | 15         | 1-29 minutes  | Contusion: Right Temporal Lobe; SAH; Fracture: Right Occipital Bone               | Normal                                                                                                                                                                            | 6    | Diverticular Disease | Omeprazole                        |
| 007      | 31  | M      | 46                         | 60                   | RTA             | 3          | > 7 Days      | Unknown (in Dominican Republic)                                                   | Contusion: Left Frontal, Right Frontal, Left Occipital, Right Occipital, Left Temporal, Right Temporal, Corpus Callosum; Atrophy: Global                                          | 6    | None                 | Propranolol 80mg                  |
| 008      | 54  | M      | 18                         | 5                    | RTA             | Unknown    | 30-59 minutes | Unknown                                                                           | Contusion: Right Frontal, Left Frontal; Microhaemorrhages: Extensive, throughout                                                                                                  | 5    | Hypothyroid          | Citalopram 30mg, Thyroxine 150mcg |
| 009      | 20  | M      | 24                         | 30                   | Incident/Fall   | Unknown    | Unknown       | Unknown                                                                           | Microhaemorrhage: Left Temporal, Right Temporal, Left dorsal lentiform nucleus; Atrophy: Left Cerebral Peduncle; Additional; Signal change in left corticospinal tract            | 6    | None                 | None                              |

|      |    |   |     |         |                   |         |              |                                                                                                                                            |                                                                                                                                                                                      |   |                                  |                                                                          |
|------|----|---|-----|---------|-------------------|---------|--------------|--------------------------------------------------------------------------------------------------------------------------------------------|--------------------------------------------------------------------------------------------------------------------------------------------------------------------------------------|---|----------------------------------|--------------------------------------------------------------------------|
| 010  | 37 | M | 35  | 10      | Violence          | 7       | Unknown      | Contusion: Left Temporal Lobe, Left Frontal Lobe; Fracture: Right Parietal; SAH: Left Frontal Lobe, Left Parietal Lobe, Left Temporal Lobe | Contusion: Left Temporal Lobe, Left Frontal Lobe; Microhaemorrhage: Right Temporal                                                                                                   | 6 | None                             | None                                                                     |
| 011  | 44 | M | 42  | 90      | RTA               | Unknown | Unknown      | Unknown                                                                                                                                    | Microhaemorrhage: Parafalcine, Left Frontal, Right Frontal, Left Occipital, Right Occipital, Right Temporal, Subcortical                                                             | 5 | None                             | Amtripryline 40mg, Vitamin D, Lanzoprazole 15mg, Testosterone injections |
| 012* | 51 | M | 266 | 21      | RTA               | Unknown | 1-29 minutes | Fracture: Occipital bone; Contusions: Left Frontal Lobe, Right Frontal Lobe                                                                | Contusion: Left Frontal Pole, Right Frontal Pole, Left Temporal Lobe                                                                                                                 | 6 | None                             | None                                                                     |
| 013  | 64 | M | 14  | 4 hours | RTA               | 14      | 0 - 1 Minute | SDH: Right; Fracture: Occipital Bone; SAH: Left Frontal; Contusion: Left Frontal, Right Frontal                                            | Superficial Siderosis: Left Frontal Pole, Right Frontal Pole, Right Temporal Lobe; Contusion: Right Frontal Lobe, Left Frontal Lobe                                                  | 6 | Hypothyroid, Glaucoma            | Omeprazole 40mg, Levothyroxine 75 mcg.                                   |
| 014  | 57 | M | 23  | 28      | RTA               | Unknown | 0-1 minute   | Unknown (in Lebanon)                                                                                                                       | Atrophy: Right Medial Temporal Lobe; Contusion: Right Cingulate Gyrus. Superficial siderosis: Parietal lobes                                                                         | 6 | None                             | Aspirin                                                                  |
| 015  | 33 | M | 144 | 42      | Incident/<br>Fall | 3       | > 7 Days     | Unknown (in Zimbabwe)                                                                                                                      | Contusion: Right Occipital Lobe; Atrophy: Global; Microhaemorrhages: Left Frontal Parafalcine, Left medial Thalamus, Right Substantia Nigra, Right Temporal Lobe, Left Temporal Lobe | 6 | None                             | None                                                                     |
| 016  | 46 | M | 37  | 15      | RTA               | Unknown | 1-29 minutes | SAH: Left Sylvian Fissure                                                                                                                  | Microbleeds: Parafalcine, Left Frontal, Right Frontal                                                                                                                                | 7 | Gastro-oesophageal relax disease | None                                                                     |

|      |    |   |     |     |                       |         |              |                                                                                                                                                                       |                                                                                                                                                                          |   |         |                                |
|------|----|---|-----|-----|-----------------------|---------|--------------|-----------------------------------------------------------------------------------------------------------------------------------------------------------------------|--------------------------------------------------------------------------------------------------------------------------------------------------------------------------|---|---------|--------------------------------|
| 017* | 20 | M | 23  | 60  | RTA                   | 13      | 1-29 minutes | SAH; Fracture: Left Occipital Bone; Contusion: Left Frontal, Right Frontal, Left Temporal, Right Temporal, Left Parietal, Right Parietal; SDH: Right Parieto-Temporal | Contusion: Right Temporal Pole, Right Frontal Pole; Microhaemorrhage: Left Parietal Lobe, Left Frontal Lobe, Right Frontal Lobe, Left Temporal Lobe, Left Occipital Lobe | 5 | None    | None                           |
| 021  | 52 | M | 43  | 5   | RTA                   | Unknown | Unknown      | Normal                                                                                                                                                                | Microhaemorrhage: Parafalcine, Left Frontal, Right Frontal                                                                                                               | 6 | None    | None                           |
| 022  | 45 | M | 32  | 14  | Other Non Intentional | 15      | 0 - 1 Minute | Not done                                                                                                                                                              | Normal                                                                                                                                                                   | 6 | None    | None                           |
| 025  | 31 | M | 73  | 90  | Violence              | Unknown | Unknown      | Unknown: Multiple skull #s, intracranial haemorrhage, diffuse axonal injury                                                                                           | Contusion: Left Temporal Pole, Right Temporal Pole; Atrophy: Cerebellum; Superficial Siderosis: Cerebellum; Microhaemorrhage: Right Temporal Lobe, Left Frontal Lobe     | 5 | None    | None                           |
| 026  | 49 | M | 249 | 120 | Other Non Intentional | 3       | None         | Unknown (in Bahamas)                                                                                                                                                  | Atrophy: Global, cerebellar, brain stem; Contusion: Right Frontal, Left Frontal, Right Temporal; Microhaemorrhage: Right Frontal, Left Frontal, Right Temporal           | 5 | Rosacea | Sildenafil PRN, Loperamide PRN |
| 028  | 24 | M | 8   | 14  | RTA                   | Unknown | Unknown      | Unknown                                                                                                                                                               | Microhaemorrhage: Parafalcine, Right Frontal, Left Frontal, Left Parietal, Left lentiform nucleus, Left Temporal, Right Temporal                                         | 6 | None    | None                           |

|      |    |   |    |    |                   |                      |              |                                                                                                                                       |                                                                                                                                                                                                                                    |   |                            |                                                   |
|------|----|---|----|----|-------------------|----------------------|--------------|---------------------------------------------------------------------------------------------------------------------------------------|------------------------------------------------------------------------------------------------------------------------------------------------------------------------------------------------------------------------------------|---|----------------------------|---------------------------------------------------|
| 033* | 52 | M | 17 | 21 | Incident/<br>Fall | Unknown              | 1-29 minutes | SDH: Large Left with midline shift; SAH: Bilateral; Contusion: Left Frontal, Right Occipital; Fracture: Occipital bone, Sphenoid bone | Contusion: Left Temporal Lobe, Left Frontal Lobe, Right Frontal Lobe, Left Cerebellar Hemisphere; Microhaemorrhage: Left Temporal, Left Frontal, Right Temporal, Right Frontal; Superficial Siderosis: Left Frontal, Left Temporal | 6 | None                       | Levetirecetam 1250mg BD, Perindopril 2mg OD       |
| 037* | 54 | M | 11 | 15 | Violence          | 12                   | 1-24 Hours   | SDH: Right; SAH: Left Frontal, Right Frontal; Contusion: Left Frontal, Left Temporal, Right Temporal, Right Occipital                 | Contusion: Right Temporal, Right Parietal, Right Frontal, Left Frontal, Left Temporal; Superficial Siderosis: Left Frontal                                                                                                         | 5 | None                       | None                                              |
| 038  | 26 | M | 17 | 56 | Violence          | Unknown (in Romania) | None         | Contusion: Left Frontal, Left Temporal, Left Parietal; SAH: Left Parietal; SDH: Left                                                  | Contusion: Left Frontal, Left Parietal; Superficial Siderosis: Left Parietal, Left Frontal                                                                                                                                         | 5 | None                       | Amitriptylline 10mg OD, Sodium Valproate 100mg OD |
| 039  | 21 | F | 14 | 35 | RTA               | Unknown              | Unknown      | Normal                                                                                                                                | Microhaemorrhage: Left Frontal, Corpus Callosum, Right Frontal                                                                                                                                                                     | 6 | None                       | Fluoxetine 20mg, Propranolol 10mg PRN             |
| 040  | 39 | F | 6  | 2  | Incident/<br>Fall | Unknown              | 0 - 1 Minute | SDH                                                                                                                                   | Normal                                                                                                                                                                                                                             | 6 | None                       | None                                              |
| 041  | 54 | M | 24 | 1  | Incident/<br>Fall | 10                   | Unknown      | Contusion: Left Temporal Lobe; SAH: Right Parietal, Left Temporal; Fracture: Left Squamous Temporal Bone                              | Contusion: Left Temporal Lobe; Microhaemorrhage: Right Temporal                                                                                                                                                                    | 8 | Inflammatory Bowel Disease | Vitamin D                                         |
| 042* | 47 | M | 51 | 3  | RTA               | Unknown              | Unknown      | SAH: Bilateral; SDH: Right Frontal, Right Parietal, Left Frontal, Left Parietal; Fracture: Right Temporal Bone                        | Contusion: Right Parietal Lobe; Microhaemorrhage: Subcortical; Superficial Siderosis: Right Parietal Lobe, Left Frontal Lobe                                                                                                       | 6 | None                       | Atorvastatin 10mg, Growth Hormone                 |

|      |    |   |     |         |                   |         |              |                                                                      |                                                                                                                                                                                                                      |   |             |                                                                                                                                                                                                                                                            |
|------|----|---|-----|---------|-------------------|---------|--------------|----------------------------------------------------------------------|----------------------------------------------------------------------------------------------------------------------------------------------------------------------------------------------------------------------|---|-------------|------------------------------------------------------------------------------------------------------------------------------------------------------------------------------------------------------------------------------------------------------------|
| 044  | 22 | M | 21  | 540     | RTA               | 3       | > 7 Days     | SAH: Right Frontal, Left Frontal; Contusion: Splenium, Left Temporal | Contusion: Left Frontal, Right Frontal, Splenium, Left Thalamus, Left Temporal; Atrophy: Global; Microhaemorrhage: Subcortical, Parafalcine, Left Temporal, Right Temporal, Splenium, Right Frontal, Left Cerebellar | 4 | None        | None                                                                                                                                                                                                                                                       |
| 045* | 34 | M | 6   | 2 hours | Incident/fal<br>1 | Unknown | 0-1 minute   | Unknown                                                              | Contusion: Small Bifrontal and Left Temporal Pole                                                                                                                                                                    | 6 | None        | None                                                                                                                                                                                                                                                       |
| 046  | 48 | M | 366 | 60      | RTA               | 3       | > 7 Days     | Unknown                                                              | Contusion: Parafalcine, Left Frontal, Right Frontal; Microhaemorrhage: Left Temporal                                                                                                                                 | 4 | Arthritis   | Amitrpylline 20mg TDS, Fexofenadine 180mg OD, Esomeprazole 40mg OD, Tramadol 50 mg TDS, Calcichew 1BD, Solifenacin 5mg TDS, Alvarine citrate 400mg BD, Botox injection 10mg OD, Mebeverine 500mg TDS, Loperamide 600mg TDS, Naproxen, Gabapentin 600mg TDS |
| 047  | 38 | M | 210 | 720     | Violence          | 3       | > 7 Days     | Unknown                                                              | Contusion: Left Occipital; Atrophy: Cerebellar, Pons, Left hemisphere                                                                                                                                                | 5 | None        | None                                                                                                                                                                                                                                                       |
| 048  | 49 | F | 158 | 7       | Violence          | Unknown | 1-29 minutes | Unknown                                                              | Normal                                                                                                                                                                                                               | 5 | Hypothyroid | Levothyroxine 150 mcg, Omeprazole, Gamolenic acid, Pyridoxine                                                                                                                                                                                              |
| 052  | 36 | F | 219 | 120     | RTA               | Unknown | Unknown      | Unknown                                                              | Contusion: Right Temporal Lobe; Microhaemorrhage: Right Frontal Lobe, Posterior Limb Right Internal Capsule, Right Occipital Lobe; Atrophy: Cerebellum, Pons                                                         | 4 | None        | None                                                                                                                                                                                                                                                       |

|      |    |   |     |     |                   |         |              |                                                                                                                                                           |                                                                                                                                                                                       |   |      |                                              |
|------|----|---|-----|-----|-------------------|---------|--------------|-----------------------------------------------------------------------------------------------------------------------------------------------------------|---------------------------------------------------------------------------------------------------------------------------------------------------------------------------------------|---|------|----------------------------------------------|
| 053* | 43 | M | 6   | 42  | RTA               | 3       | Unknown      | SDH: Right;<br>Contusion: Right Frontal Lobe                                                                                                              | Superficial Siderosis: Right Frontal Lobe (vertex);<br>Microhaemorrhage: Right Frontal lobe, Corpus Callosum (Genu and Splenium), Mid Brain.                                          | 5 | None | None                                         |
| 054  | 31 | M | 22  | 21  | Violence          | Unknown | 1-29 minutes | Contusion: Right Frontal, Right Temporal Lobe                                                                                                             | Contusion: Right Frontal, Right Temporal Lobe                                                                                                                                         | 8 | None | Lamotrigine 50mg BD, Growth Hormone 2 mg OD. |
| 055  | 37 | M | 205 | 120 | Incident/<br>Fall | 3       | > 7 Days     | Unknown                                                                                                                                                   | Contusion: Right Frontal Lobe, Left Frontal Lobe, Left Temporal Lobe;<br>Atrophy: Corpus Callosum, Left Temporal Lobe, Right Cerebral Peduncle;<br>Previous Right Frontal Craniectomy | 5 | None | Tegetrol CR 400mg BD                         |
| 056  | 33 | M | 147 | 28  | RTA               | Unknown | Unknown      | Fracture: Left Squamous Temporal Bone;<br>Contusion: Right Frontal Lobe, Left Frontal Lobe, Left Temporal Lobe;<br>SAH: Left Frontal, Left Temporal Lobes | Contusion: Right Frontal Lobe;<br>Microhaemorrhage: Parafalcine, Right Frontal, Left Frontal;<br>High Signal: Periventricular and Pontine, inkeeping with demyelination               | 6 | None | Baclofen 20mg OD, Citalopram 10mg OD         |
| 057* | 34 | M | 9   | 7   | Incident/<br>Fall | 10      | 1-24 Hours   | Normal                                                                                                                                                    | Contusion: Left Caudate Head;<br>Microhaemorrhage: Left Temporal Pole, Left Occipital Lobe, Parafalcine (Left and Right Frontal Lobes)                                                | 6 | None | None                                         |

|     |    |   |     |     |          |         |            |                                                                                                                                                                                                      |                                                                                                                                                                                    |   |                                   |                    |
|-----|----|---|-----|-----|----------|---------|------------|------------------------------------------------------------------------------------------------------------------------------------------------------------------------------------------------------|------------------------------------------------------------------------------------------------------------------------------------------------------------------------------------|---|-----------------------------------|--------------------|
| 060 | 32 | M | 73  | 28  | RTA      | 3       | > 7 Days   | EDH: Right Temporal;<br>Fracture: Right Temporal Bone, Right Greater Wing of Sphenoid, Left Frontal Bone, Left Greater Wing of Sphenoid, Left Maxillary Wall, Left Zygomatic Arch; SAH: Right Vertex | EDH: Left Frontal, Right Temporal, Left Occipital; SAH: Right Vertex; Contusion: Left Frontal Lobe; High Signal: Splenium; Microhaemorrhage: Left Frontal Lobe, Right Frontal Lobe | 6 | Asthma                            | Symbicort          |
| 061 | 52 | M | 23  | 4   | Violence | Unknown | Unknown    | Unknown                                                                                                                                                                                              | Contusion Right Frontal Lobe, Left Frontal Lobe, Right Temporal Lobe, Right Temporal Lobe                                                                                          | 6 | Gastro-oesophageal reflux disease | Lanzoprazole 15 mg |
| 063 | 38 | M | 9   | 14  | Violence | 3       | 1-24 Hours | Contusion: Left Frontal Lobe, Right Frontal Lobe; SDH: Parafalcine; SAH: Parafalcine; Fracture: Right Occipital Bone                                                                                 | Contusion: Right Frontal Lobe, Right Temporal Lobe; SDH: Parafalcine; SAH: Parafalcine                                                                                             | 6 | None                              | None               |
| 064 | 31 | M | 112 | 120 | RTA      | 6       | > 7 Days   | Contusion: Left Frontal Lobe, Right Frontal Lobe, Corpus Callosum, Right Thalamus                                                                                                                    | Contusion: Parafalcine (Right and Left Frontal Lobes), Right Thalamus; Microhaemorrhage: Left Frontal Lobe, Right Frontal Lobe, Right Temporal Pole                                | 5 | None                              | None               |
| 065 | 39 | M | 33  | 8   | RTA      | Unknown | 1-24 Hours | Contusion: Left Frontal Lobe                                                                                                                                                                         | Contusion: Left Frontal Lobe, Right Frontal Lobe                                                                                                                                   | 5 | None                              | None               |

**Supplementary Table 1. Clinical demographics of the traumatic brain injury patients.** PTA = Post-traumatic amnesia; GCS = Glasgow Coma Scale; LOC = Loss of Consciousness; CT = Computed Tomography; SDH = subdural haematoma; SAH = subarachnoid haemorrhage; RTA = Road Traffic Accident; OD = omni die (once a day); BD = bis die (twice a day); TDS = ter die sumendus (three times a day); QDS = quarter die sumendus (four times a day); PRN = pro re nata (taken if needed). \*Study ID indicates those subjects whose lesions overlapped with areas of functional connectivity change.
