# Supplementary material for: Altered caudate connectivity is associated with executive dysfunction after traumatic brain injury
Source: PubMed Central journal article supplement (PMC5837394; doi:10.1093/brain/awx309), 2017-11-23
Supplement: brain-2017-00481-file013_awx309.pdf [file brain-2017-00481-file013_awx309.pdf]

| Cognitive Domain          | Neuropsychological Test                                 | Thalamic 'Prefrontal' Region to ACC FC |                   | Thalamic 'Primary Motor' Region to ACC FC |                  |
|---------------------------|---------------------------------------------------------|----------------------------------------|-------------------|-------------------------------------------|------------------|
|                           |                                                         | Right                                  | Left              | Right                                     | Left             |
| <b>Processing Speed</b>   | Trail Making Test B (s)                                 | 0.294<br>(0.082)                       | 0.233<br>(0.172)  | 0.229<br>(0.179)                          | 0.281<br>(0.100) |
|                           | Stroop Colour Naming & Word Reading Composite Score (s) | -0.017<br>(0.921)                      | -0.090<br>(0.599) | 0.074<br>(0.667)                          | 0.054<br>(0.753) |
| <b>Executive Function</b> | Stroop Inhibition (s)                                   | -0.002<br>(0.991)                      | -0.094<br>(0.587) | 0.115<br>(0.506)                          | 0.025<br>(0.883) |
|                           | Stroop Inhibition-Switching (s)                         | 0.150<br>(0.382)                       | 0.046<br>(0.789)  | 0.178<br>(0.298)                          | 0.127<br>(0.460) |
|                           | Stroop Inhibition-Switching vs Baseline Contrast (s)    | 0.181<br>(0.291)                       | 0.078<br>(0.651)  | 0.177<br>(0.303)                          | 0.131<br>(0.450) |
| <b>Memory</b>             | PT Delayed Recall                                       | 0.113<br>(0.511)                       | 0.197<br>(0.249)  | 0.038<br>(0.826)                          | 0.043<br>(0.803) |

**Supplementary Table 2. Relationship between neuropsychological measures and thalamic to anterior cingulate cortex (ACC) functional connectivity (FC) in TBI patients, using Spearman's rank-order approach (Rho). Peoples test (PT). Seconds (s).**
